# Supplementary material for: IRF2 is required for development and functional maturation of human NK cells
Source: PubMed Central journal article supplement (PMC9762550; doi:10.3389/fimmu.2022.1038821), 2022-12-05
Supplement: DataSheet_1.pdf [file DataSheet_1.pdf]

## *Supplementary Material*

### 1 **Supplementary Table 1.** Utilized antibodies for flow cytometry

| <b>Marker</b>                  | <b>Alternative name</b> | <b>Fluorochrome</b>                   | <b>Clone</b>    | <b>Supplier</b>          |
|--------------------------------|-------------------------|---------------------------------------|-----------------|--------------------------|
| <b>CD3</b>                     | CD3                     | APC                                   | SK7             | BD Biosciences           |
| <b>CD11a</b>                   | LFA-1                   | PE, Alexa Fluor 700                   | HI111           | Biologend                |
| <b>CD14</b>                    | CD14                    | APC                                   | REA599          | Miltenyi Biotec          |
| <b>CD16</b>                    | Fc $\gamma$ RIIIA       | PE, APC                               | B73.1           | Biologend                |
| <b>CD19</b>                    | CD19                    | APC                                   | SJ25C1          | Thermo Fisher Scientific |
| <b>CD34</b>                    | CD34                    | PE, PB                                | AC136           | Miltenyi Biotec          |
| <b>CD45</b>                    | CD45                    | APC/Fire <sup>TM</sup> 750 (APC-Fire) | 2D1             | Biologend                |
| <b>CD56</b>                    | NCAM1                   | VioBlue (VB), APC                     | 5.1H11          | Biologend                |
| <b>CD94</b>                    | KLRD1                   | PerCP-Cy5.5                           | DX22            | Biologend                |
| <b>CD117</b>                   | KIT                     | PECy7                                 | 104D2           | Thermo Fisher Scientific |
| <b>CD158a,h</b>                | KIR2DL1/KIR2DS1         | PE                                    | REA1010         | Miltenyi Biotec          |
| <b>CD158b1/b2</b>              | KIR2DL2/KIR2DL3         | PE                                    | REA1006         | Miltenyi Biotec          |
| <b>CD158e1/e2</b>              | KIR3DL1/KIR3DS1         | PE                                    | REA168          | Miltenyi Biotec          |
| <b>CD158i</b>                  | KIR4DS1                 | PE                                    | REA860          | Miltenyi Biotec          |
| <b>NKG2A</b>                   | CD159a                  | APC                                   | REA110          | Miltenyi Biotec          |
| <b>NKG2C</b>                   | CD159c                  | PE                                    | FAB138P         | R&D systems              |
| <b>CD226</b>                   | DNAM-1                  | Alexa Fluor 647                       | DX11            | BD Biosciences           |
| <b>NKG2D</b>                   | CD314                   | APC                                   | 1D111           | Biologend                |
| <b>NKp46</b>                   | CD335;NCR1              | PECy7                                 | 9E2             | Biologend                |
| <b>NKp44</b>                   | CD336;NCR2              | eFluor450, APC                        | 44.189          | Thermo Fisher Scientific |
| <b>NKp30</b>                   | CD337                   | PE                                    | P30-15          | Biologend                |
| <b>SLAMF6</b>                  | NTB-A/CD352             | PE                                    | NT-7            | Biologend                |
| <b>Granzyme B</b>              | Granzyme B              | PE                                    | GB11            | Thermo Fisher Scientific |
| <b>HLA-DR</b>                  | HLA-DR                  | eFluor780                             | LN3             | Thermo Fisher Scientific |
| <b>Perforin</b>                | Perforin                | PE                                    | dG9             | Thermo Fisher Scientific |
| <b>CD45RA</b>                  | CD45RA                  | APC, Brilliant Violet 421             | HI100           | Biologend                |
| <b>AHR</b>                     | AHR                     | PE                                    | FF3399          | Thermo Fisher Scientific |
| <b>AIOS</b>                    | IKZF3                   | PE                                    | 16D9C97         | Biologend                |
| <b>CBFB</b>                    | CBFB                    | unconjugated                          | JG39-35         | Thermo Fisher Scientific |
| <b>Donkey Anti-Rabbit</b>      | Donkey Anti-Rabbit      | PE                                    | Poly4064        | Biologend                |
| <b>EOMES</b>                   | EOMES                   | PE, eFluor660                         | WD1928          | Thermo Fisher Scientific |
| <b>GATA2</b>                   | GATA2                   | PE                                    | W17242A         | Biologend                |
| <b>HELIOS</b>                  | IKZF2                   | APC                                   | 22F6            | Biologend                |
| <b>HOBIT</b>                   | ZNF683                  | Alexa Fluor 647                       | Sanquin-Hobit/1 | BD Biosciences           |
| <b>ID2</b>                     | ID2                     | APC                                   | ILCID2          | Thermo Fisher Scientific |
| <b>IFN-<math>\gamma</math></b> | IFN- $\gamma$           | eFluor 660                            | 4S.B3           | Thermo Fisher Scientific |
| <b>IKZF2</b>                   | HELIOS                  | APC                                   | 22F6            | Biologend                |

|                                |               |       |         |                              |
|--------------------------------|---------------|-------|---------|------------------------------|
| <b>IRF8</b>                    | IRF8          | APC   | V3GYWCH | Thermo Fisher Scientific     |
| <b>NFIL3</b>                   | E4BP4         | PE    | MABA223 | Thermo Fisher Scientific     |
| <b>PRDM1</b>                   | Blimp-1       | PE    | 6D3     | BD Biosciences               |
| <b>RUNX2</b>                   | AML3, CBFA1   | PE    | D1L7F   | Cell Signalling Technologies |
| <b>RUNX3</b>                   | AML42 CBFA3   | PE    | R3-5G4  | BD Biosciences               |
| <b>TBET</b>                    | TBET          | PE    | 4B10    | Thermo Fisher Scientific     |
| <b>TNF-<math>\alpha</math></b> | TNF- $\alpha$ | PECy7 | Mab11   | Thermo Fisher Scientific     |
| <b>TOX</b>                     | TOX           | PE    | TXRX10  | Thermo Fisher Scientific     |

Allophycocyanin (APC), Peridinin Chlorophyll Protein-Cyanin5.5 (PerCP-Cy5.5), Phycoerythrin (PE), Phycoerythrin-Cyanin7 (PECy7)

## 2 Supplementary Table 2. Utilized qPCR primers

| <b>Gene</b>                            | <b>Sense</b> | <b>Sequence</b>                |
|----------------------------------------|--------------|--------------------------------|
| IRF2                                   | forward      | 5'-AAGCACACTGAGAGGGGCAC-3'     |
|                                        | reverse      | 5'-CATCCACCCATGTCTAGCC-3'      |
| IRF2<br>(flanking shRNA binding sites) | forward      | 5'-CGATGAAGAGAGTGCCGAG-3'      |
|                                        | reverse      | 5'-TTGAAAAGGGGGCCAGGAG-3'      |
| BTG3                                   | forward      | 5'-ATGAAATTGCTGCCGTTGTCT-3'    |
|                                        | reverse      | 5'-GCCTGTCCTTTCGATGGTTTT-3'    |
| ZWILCH                                 | forward      | 5'-TCCCTCCACTCTCTTCAACTGC-3'   |
|                                        | reverse      | 5'-CCAGTCCTCAAACCATCAGCCA-3'   |
| CLSPN                                  | forward      | 5'-TGAAAACCTCAGGCAAGCAGCCTA-3' |
|                                        | reverse      | 5'-GGCTGATAGGATGGAATCGTGG-3'   |
| GAPDH                                  | forward      | 5'-TCCTCTGACTTCAACAGCGACA-3'   |
|                                        | reverse      | 5'-GTGGTCGTTGAGGGCAATG-3'      |
| TBP                                    | forward      | 5'-CACGAACCACGGCACTGATT-3'     |
|                                        | reverse      | 5'-TTTTCTTGCTGCCAGTCTGGAC-3'   |
| YWHAZ                                  | forward      | 5'-ACTTTTGGTACATTGTGGCTTCAA-3' |
|                                        | reverse      | 5'-CCGCCAGGACAAACCAGTAT-3'     |

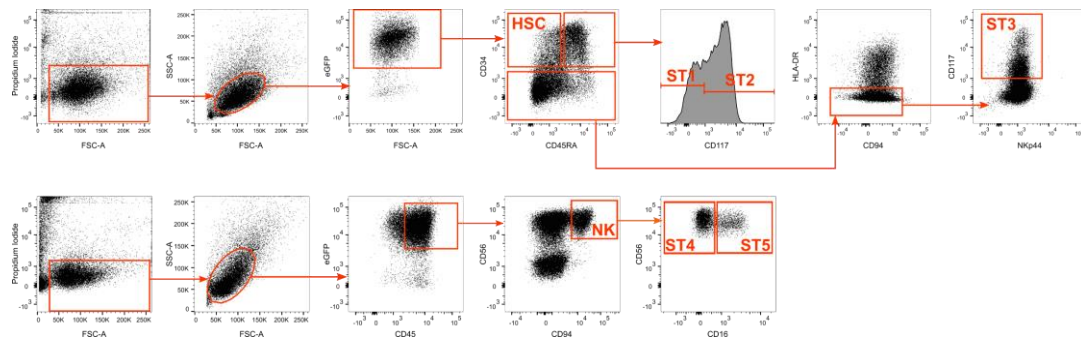

**Supplementary Figure 1. Gating strategy of NK cell developmental stages in differentiation cultures.** Flow cytometric gating strategy of NK cell developmental stages, including HSC (CD34<sup>+</sup>CD45RA<sup>-</sup>), stage 1 (CD34<sup>+</sup>CD45RA<sup>+</sup>CD117<sup>-</sup>), stage 2 (CD34<sup>+</sup>CD45RA<sup>+</sup>CD117<sup>+</sup>), stage 3 (CD34<sup>-</sup>CD94<sup>-</sup>CD117<sup>+</sup>HLA-DR<sup>-</sup>NKp44<sup>-</sup>), stage 4 (CD45<sup>+</sup>CD56<sup>+</sup>CD94<sup>+</sup>CD16<sup>-</sup>) and stage 5 (CD45<sup>+</sup>CD56<sup>+</sup>CD94<sup>+</sup>CD16<sup>+</sup>).

**Supplementary Table 3.** Differentially expressed genes in d3 HSC and d7 ST3 cells in the gene ontology (GO) positive and negative regulation of mitotic cell cycle pathways. Genes containing an IRF2-binding motif are marked as bold.

| HSC                                          |               |                                              |              | ST3                                          |                |                                              |                        |
|----------------------------------------------|---------------|----------------------------------------------|--------------|----------------------------------------------|----------------|----------------------------------------------|------------------------|
| GO positive regulation of mitotic cell cycle |               | GO negative regulation of mitotic cell cycle |              | GO positive regulation of mitotic cell cycle |                | GO negative regulation of mitotic cell cycle |                        |
| DOWN<br>(4)                                  | UP<br>(4)     | DOWN<br>(12)                                 | UP<br>(4)    | DOWN<br>(6)                                  | UP<br>(7)      | DOWN<br>(15)                                 | UP<br>(14)             |
| <i>CYP11A1</i>                               | <i>RAB11A</i> | <i>TAOK3</i>                                 | <i>INHBA</i> | <i>DYNLT3</i>                                | <i>DTL</i>     | <i>CTDSP2</i>                                | <i>BRCA1</i>           |
| <i>CCND2</i>                                 | <i>NSMCE2</i> | <i>PTEN</i>                                  | <i>BTG2</i>  | <i>MEIS2</i>                                 | <i>CDC6</i>    | <i>TAOK3</i>                                 | <i>CLSPN</i>           |
| <i>CDK4</i>                                  | <i>HES1</i>   | <i>CTDSP1</i>                                | <i>BTG3</i>  | <i>ANXA1</i>                                 | <i>ANKRD17</i> | <i>CCL2</i>                                  | <i>ZWILCH</i>          |
| <i>CCNB1</i>                                 | <i>EIF4E</i>  | <i>TOPBP1</i>                                | <i>SDE2</i>  | <i>PBX1</i>                                  | <i>ANAPC5</i>  | <i>ABRAXAS1</i>                              | <i>ZWINT</i>           |
|                                              |               | <i>HMGA2</i>                                 |              | <i>PRKCA</i>                                 | <i>AIF1</i>    | <i>PTEN</i>                                  | <i>DTL</i>             |
|                                              |               | <i>BLM</i>                                   |              | <i>PFAH1B1</i>                               | <i>BRCA2</i>   | <i>CDKN1C</i>                                | <i>CDC6</i>            |
|                                              |               | <b><i>CDK5RAP2</i></b>                       |              |                                              | <i>EIF4E</i>   | <i>FHL1</i>                                  | <i>TPR</i>             |
|                                              |               | <i>ZFP36L2</i>                               |              |                                              |                | <i>CHMP4C</i>                                | <i>PRKDC</i>           |
|                                              |               | <i>ORC1</i>                                  |              |                                              |                | <i>CDKN1A</i>                                | <i>BABAM1</i>          |
|                                              |               | <i>CCNB1</i>                                 |              |                                              |                | <b><i>ZFP36L1</i></b>                        | <i>DONSON</i>          |
|                                              |               | <i>NACC2</i>                                 |              |                                              |                | <i>NABP1</i>                                 | <i>NDC80</i>           |
|                                              |               | <b><i>FHL1</i></b>                           |              |                                              |                | <i>CCNG1</i>                                 | <i>MSH2</i>            |
|                                              |               |                                              |              |                                              |                | <i>BTG2</i>                                  | <b><i>CDK5RAP2</i></b> |
|                                              |               |                                              |              |                                              |                | <i>BTN2A2</i>                                | <i>MAD2L1</i>          |
|                                              |               |                                              |              |                                              |                | <b><i>CRLF3</i></b>                          |                        |
